# Supplementary material
Source: Springer Nature journal article supplement (https://www.springermedizin.de/resource/supplementary/12877_2010_328_MOESM2_ESM.pdf/9439396)

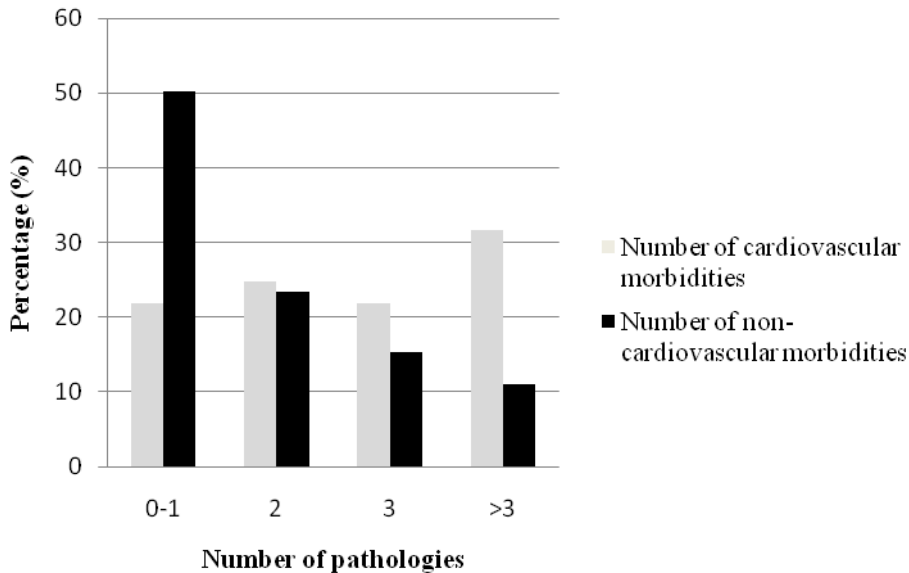

Supplement: MOESM2 [file 9439396]
